# Supplementary material for: Isoquercitrin alleviates lipopolysaccharide-induced intestinal mucosal barrier damage in mice by regulating TLR4/MyD88/NF-κB signaling pathway and intestinal flora
Source: Royal Society of Chemistry journal article supplement (doi:10.1039/d3fo03319h), 2023-12-06
Supplement: d3fo03319h1.pdf [file d3fo03319h1.pdf]

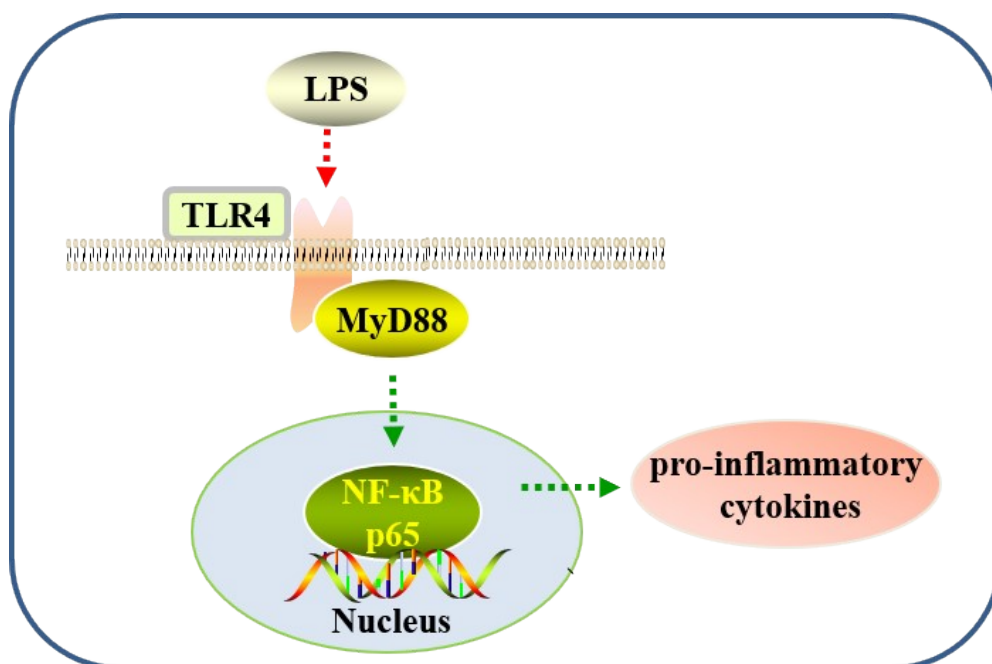

Fig. S1 Schematic diagram for the relationship of pro-inflammatory cytokines and the TLR4/MyD88/NF-κB pathway.
