# Supplementary material for: Isoquercitrin alleviates lipopolysaccharide-induced intestinal mucosal barrier damage in mice by regulating TLR4/MyD88/NF-κB signaling pathway and intestinal flora
Source: Royal Society of Chemistry journal article supplement (doi:10.1039/d3fo03319h), 2023-12-06
Supplement: d3fo03319h2.pdf [file d3fo03319h2.pdf]

**Table S1** Primer sequences for Q-PCR analysis

| <b>Target gene</b> | <b>Forward sequence (5'→3')</b> | <b>Reverse sequence (3'→5')</b> |
|--------------------|---------------------------------|---------------------------------|
| ZO-1               | GCTTTAGCGAACAGAAGGAGC           | TTCATTTTTCCGAGAAGGAGC           |
| Claudin-1          | TCAGGTCTGGCGACATTAGT            | GACAGGAGCAGGAAAGTAGGA           |
| Occludin           | TGCTTCATCGCTTCCTTAGTAA          | GGTTCACTCCCATTATGTACA           |
| MUC2               | ATGCCACCTCCTCAAAGAC             | GTAGTTTCCGTTGGAACAGTGAA         |
| TLR4               | ATGGCATGGCTTACACCACC            | GAGGCCAATTTTGTCTCCACA           |
| MyD88              | TCATGTTCTCCATACCCTTGGT          | AAACTGCGAGTGGGGTCAG             |
| NF-κB p65          | TGCGATTCCGCTATAAATGCG           | ACAAGTTCATGTGGATGAGGC           |
| IL-6               | CTGCAAGAGACTTCCATCCAG           | AGTGGTATAGACAGGTCTGTTGG         |
| IL-1β              | GAAATGCCACCTTTTGACAGTG          | TGGATGCTCTCATCAGGACAG           |
| TNF-α              | CAGGCGGTGCCTATGTCTC             | CGATCACCCCGAAGTTCAGTAG          |
| β-actin            | GGCTGTATTCCCCTCCATCG            | CCAGTTGGTAACAATGCCATGT          |
